# Supplementary material for: Microbiota-derived short-chain fatty acids promote Th1 cell IL-10 production to maintain intestinal homeostasis
Source: PubMed Central journal article supplement (PMC6120873; doi:10.1038/s41467-018-05901-2), 2018-09-03
Supplement: 41467_2018_5901_MOESM1_ESM.pdf [file 41467_2018_5901_MOESM1_ESM.pdf]

## SUPPLEMENTARY INFORMATION

Microbiota-derived short-chain fatty acids promote Th1 cell IL-10 production to maintain intestinal homeostasis

Sun et al

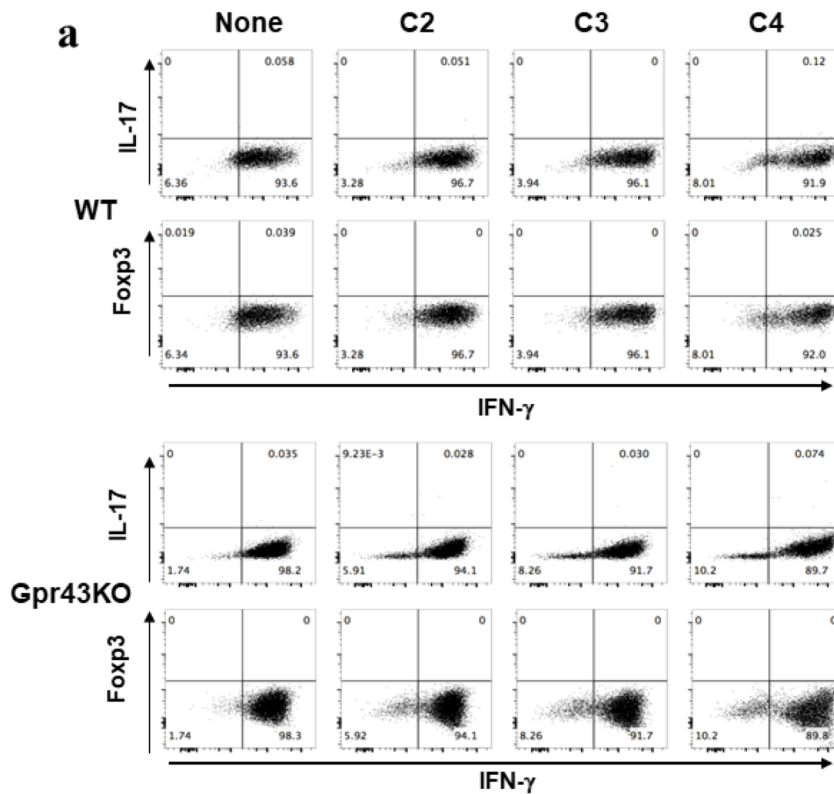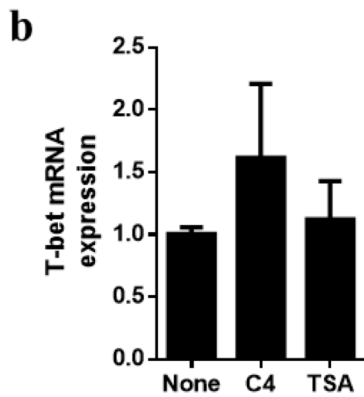

**Supplementary figure 1. SCFAs do not affect expression of IL-17, Foxp3, and T-bet in Th1 cells.** (a) WT and Gpr43KO CBir1 Tg Th1 cells were cultured with APC and CBir1 peptide in the presence or absence of C2, C3, and C4 for 5 days. The expression of IL-17 and Foxp3 was determined by flow cytometry analysis. (b) CBir1 Tg Th1 cells were cultured with APC and CBir1 peptide in the presence or absence of C4 and TSA for 5 days. The expression of T-bet was examined by qRT-PCR analysis. The results are shown as mean  $\pm$  SD of triplicates. The data are representative of three independent experiments.

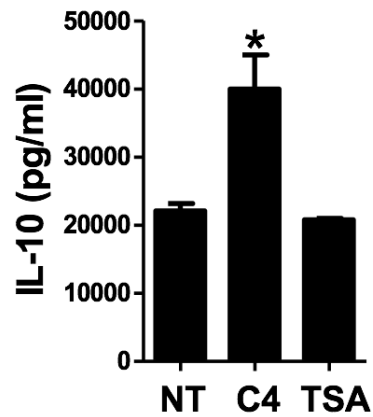

**Supplementary figure 2. Butyrate but not HDAC inhibitor promotes Th1 cell production of IL-10.**  $1 \times 10^6$  CBir1 Th1 cells were stimulated with C4 and HDAC inhibitor TSA, respectively, for 5 days. The IL-10 in culture supernatants was determined by ELISA. Results are shown as mean  $\pm$  SD of triplicates from one representative of three experiments performed. \* $p < 0.05$  one-way ANOVA test.

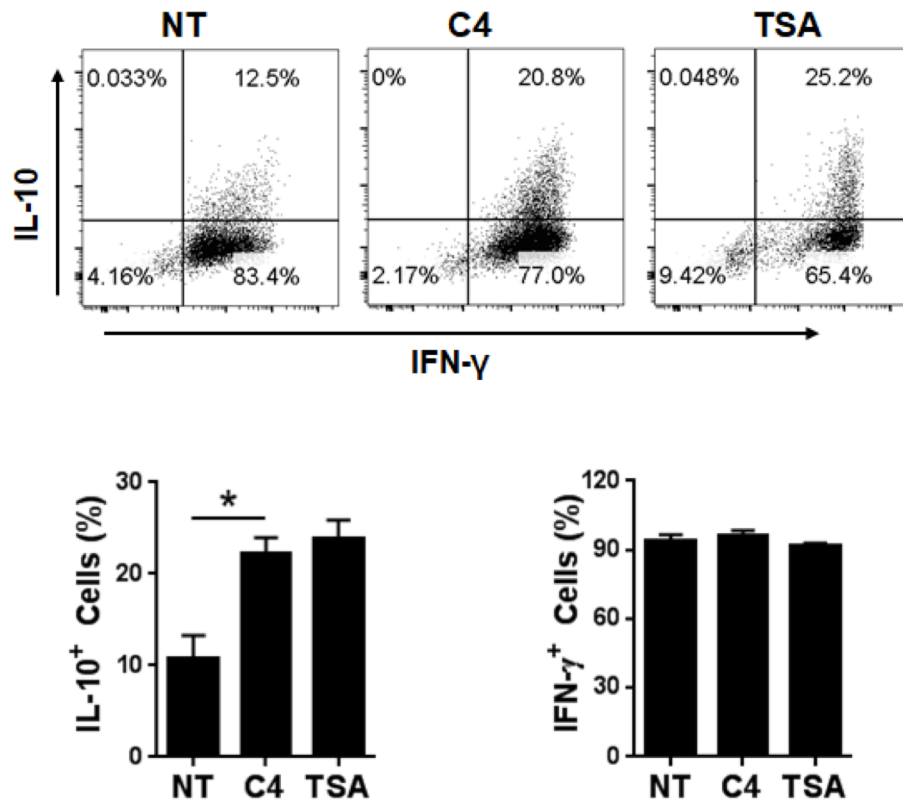

**Supplementary figure 3. HDAC inhibitor promotes naïve T cell production of IL-10.**  $1 \times 10^6$  naïve CBir1 T cells were stimulated with C4 and HDAC inhibitor TSA, respectively, for 5 days. The expression of IL-10 and IFN- $\gamma$  was examined by flow cytometry analysis. Results are shown as mean  $\pm$  SD of triplicates from one representative of two experiments performed. \* $p < 0.05$  one-way ANOVA test.

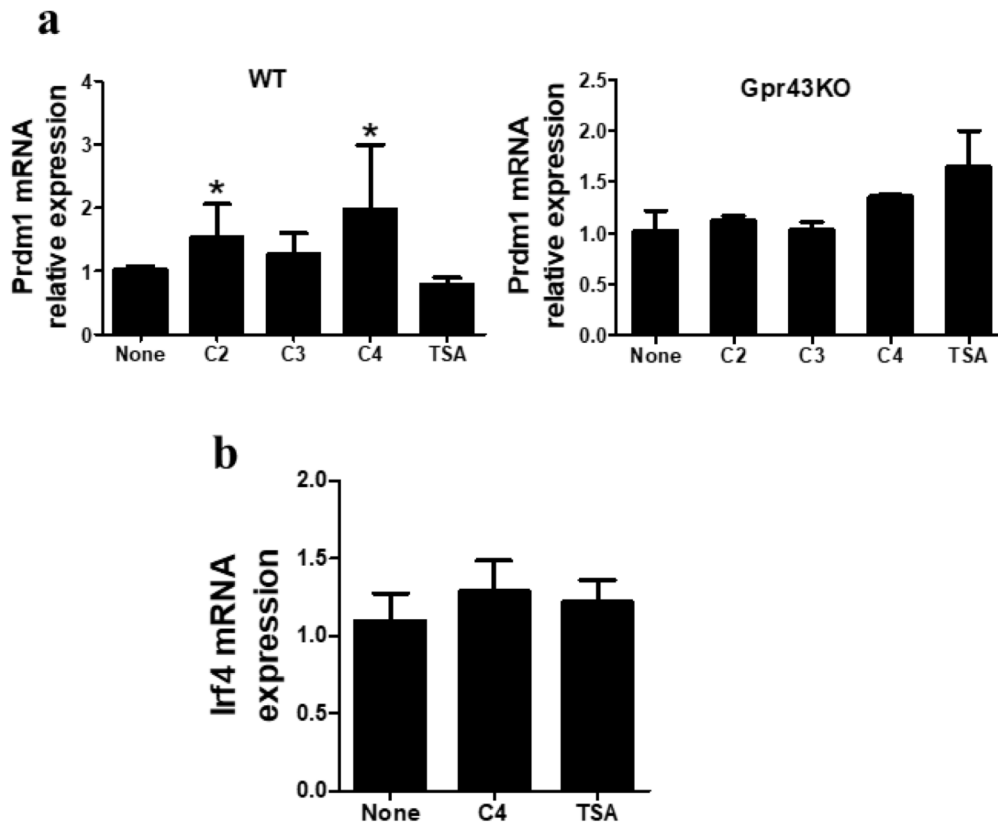

**Supplementary figure 4. SCFAs promote Blimp1 expression of Th1 cells through GPR43 but not HDAC inhibition.** (a) WT and GPR43KO CBir1 Tg Th1 cells were cultured with APC and CBir1 peptide in the presence or absence of C2, C3, C4, and TSA for 5 days. The expression of Blimp1 was determined by qRT-PCR. (b) CBir1 Tg Th1 cells were cultured with APC and CBir1 peptide in the presence or absence of C4 and TSA for 5 days. The expression of IRF4 was determined by qRT-PCR. The results are shown as mean  $\pm$  SD of triplicates. The data are representative of three independent experiments. \* $p < 0.05$ .

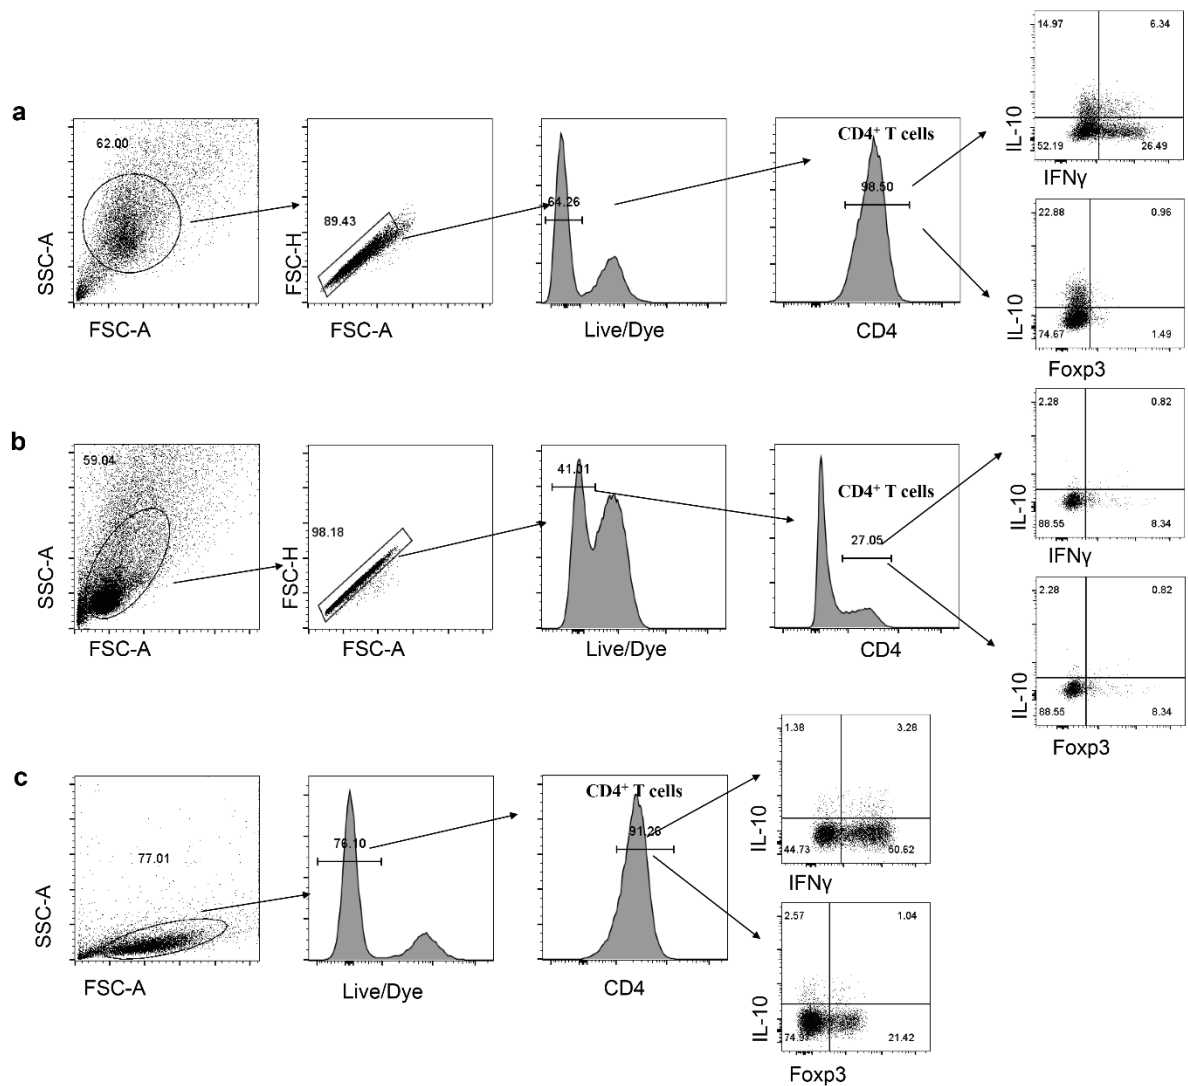

**Supplementary Figure 5. FACS gating strategies.** (a) Strategies to gate cytokines of mouse CD4<sup>+</sup> T cells in vitro used in Figure 2a-d, 5c-f, and 7f. (b) Strategies to gate cytokines of mouse CD4<sup>+</sup> T cells in vivo used in Figure 1c, 3a-e, 4c, 6c, and 9c. (c) Strategies to gate cytokines of human CD4<sup>+</sup> T cells in vitro used in Figure 8a.

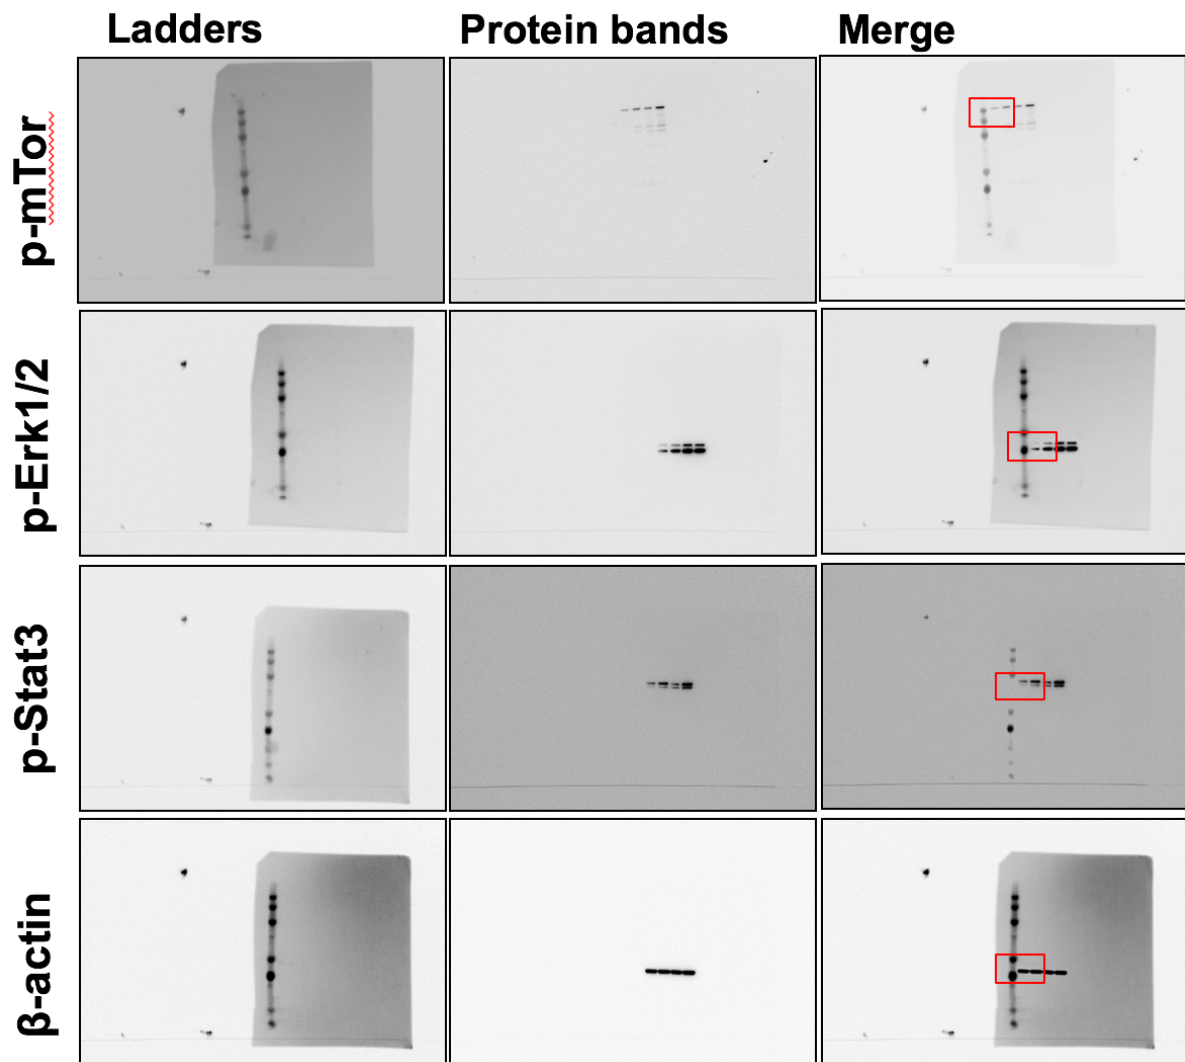

**Supplementary figure 6. Uncropped scans of western blot.** Th1 cells were cultured with anti-CD3 and anti-CD28 mAbs in the presence or absence of butyrate (C4). The cell lysates were prepared, and Western blot was used to determine p-mTOR, p-ERK1/2, and p-SATA3, and  $\beta$ -actin 15 min and 2 hrs after stimulation. Ladders and protein bands were developed using fluorescence (left panel) and chemiluminescence (middle panel), respectively. Photoshop (CC2017) was used to merge ladders and protein bands together into one picture (right panel). Cell lysates from left to right are Ctrl (15 min), C4 (15 min), Ctrl (2 hrs), and C4 (2 hrs).

**Supplementary Table 1. Clinical characteristics of IBD patients**

|                          | Blood samples |           |           |
|--------------------------|---------------|-----------|-----------|
|                          | Con           | CD (A)    | UC (A)    |
| Number of patients       | 6             | 6         | 6         |
| Age (y)                  | 32.6±15.6     | 31.2±14.5 | 40.5±16.5 |
| Gender                   |               |           |           |
| Male                     | 3             | 4         | 4         |
| Female                   | 3             | 2         | 2         |
| Disease duration (month) |               | 66±31.5   | 38±12.8   |
| Current therapy          |               |           |           |
| 5-aminosalicylates       |               | 4         | 5         |
| Azathioprine             |               | 2         | 3         |
| Corticosteroids          |               | 2         | 3         |
| IFX                      |               | 3         | 2         |
| Disease extent (UC)      |               |           |           |
| E1                       |               |           | 0         |
| E2                       |               |           | 3         |
| E3                       |               |           | 3         |
| Disease location         |               |           |           |
| L1                       |               | 1         |           |
| L2                       |               | 2         |           |
| L3                       |               | 3         |           |
| L4                       |               | 0         |           |
| CRP (mg/l)               |               | 26.8±10.3 | 43.6±13.4 |

CD = Crohn's disease; UC = ulcerative colitis; IFX = infliximab; CRP = C-reactive protein.



**Supplementary Table 2. Primers for real-time PCR and CRISPR-guide RNA oligo sequences**

| <b>Probes and primers (ThermoFisher)</b>         |                |                           |                           |
|--------------------------------------------------|----------------|---------------------------|---------------------------|
| <b>Genes</b>                                     | <b>Species</b> | <b>IDs</b>                |                           |
| GAPDH                                            | Mouse          | Mm99999915_g1             |                           |
| IL-10                                            | Mouse          | Mm00439614_m1             |                           |
| IL-17A                                           | Mouse          | Mm00439618_m1             |                           |
| Prdm1                                            | Mouse          | Mm00476128_m1             |                           |
| IFN- $\gamma$                                    | Mouse          | Mm01168134_m1             |                           |
| Tbet                                             | Mouse          | Mm00450960_m1             |                           |
| Ifr4                                             | Mouse          | Mm00516431_m1             |                           |
| <b>SYBR Green Primers</b>                        |                |                           |                           |
| <b>Genes</b>                                     | <b>Species</b> | <b>Forward primer</b>     | <b>Reverse primer</b>     |
| GAPDH                                            | Mouse          | CCATGGAGAAGGCTGGGG        | CAAGTTGTCATGGGATAACC      |
| STAT3                                            | Mouse          | GGATCGCTGAGGTACAACCC      | GTCAGGGGTCTCGACTGTCT      |
| MTOR                                             | Mouse          | AGCAACAGTGAGAGTGAA        | AGGAGATAGAACGGAAGAAG      |
| MERK                                             | Mouse          | TGGGCACGAGATCCTACATG      | TGGCATCAGGAGGAGGAATG      |
| GAPDH                                            | Human          | CAGGAGGCATTGATGATGAT      | GAAGGCTGGGGCTCATT         |
| Prdm1                                            | Human          | AAGCAACTGGATGCGCTATGT     | GGGATGGGCTTAATGGTGTAGAA   |
| <b>Guide RNA oligo sequences for lentiCRISPR</b> |                |                           |                           |
| <b>Genes</b>                                     | <b>Species</b> | <b>Forward primer</b>     | <b>Reverse primer</b>     |
| STAT3                                            | Mouse          | CACCGCGATTACCTGCACTCGCTTC | AAACGAAGCGAGTGCAGGTAATCGC |
| MTOR                                             | Mouse          | CACCGTGATACGAACTAGCTCGTTG | AAACCAACGAGCTAGTTCGTATCAC |
| ERK1                                             | Mouse          | CACCGCTTGTGCTTCTCCCGAAGAT | AAACATCTTCGGGAGAAGCACAAGC |
